# Supplementary material
Source: PubMed Central journal article supplement (PMC3103317)
Supplement: supp_M111.229781_Supplementary_informationrev.pdf [file supp_M111.229781_Supplementary_informationrev.pdf]

# **5'-Methylthioadenosine Nucleosidase is Implicated in Playing a Key Role in the Modified Futasine Pathway for Menaquinone Biosynthesis in *Campylobacter jejuni***

*Xu Li<sup>1</sup>, Dmitry Apel<sup>2</sup>, Erin C. Gaynor<sup>2</sup>, Martin E. Tanner<sup>1</sup>*

*<sup>1</sup>Department of Chemistry, University of British Columbia, 2036 Main Mall, Vancouver, British Columbia, Canada, V6T 1Z1*

*<sup>2</sup>Department of Microbiology & Immunology, University of British Columbia, 2350 Health Science Mall, Vancouver, British Columbia, Canada, V6T 1Z3*

## **Content:**

|                                      |       |
|--------------------------------------|-------|
| Materials and General Methods .....  | S2    |
| Synthetic Procedures .....           | S2-S4 |
| <sup>1</sup> H NMR Spectra .....     | S5-S6 |
| <sup>1</sup> H NMR Time Course ..... | S7    |
| Enzyme Kinetics Data .....           | S8    |

## Materials and General Methods

Chemicals were purchased from Sigma-Aldrich and used without further purification unless otherwise noted. Dry solvents were distilled fresh, using CaH<sub>2</sub> (CH<sub>2</sub>Cl<sub>2</sub> and MeOH) or Na/benzophenone (THF) as drying agents. <sup>1</sup>H NMR spectra were recorded on Bruker AV300 or AV400 spectrometers. Chemical shifts are reported in ppm with residual undeuterated solvents as the internal standard (referenced to 7.26 ppm for CDCl<sub>3</sub>, and 4.79 ppm for D<sub>2</sub>O). Mass spectra were obtained on a Waters Micromass LCT mass spectrometer using electrospray ionization (ESI-MS).

## Synthetic Procedures

### *N*<sup>6</sup>,*N*<sup>6</sup>-Bis(*tert*-butoxycarbonyl)-2',3'-*O*-isopropylideneadenosine (**2**)

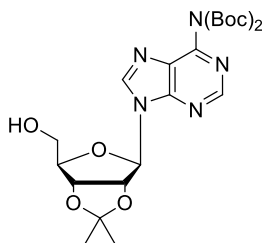

*N*<sup>6</sup>,*N*<sup>6</sup>-Bis(*tert*-butoxycarbonyl)-2',3'-*O*-isopropylideneadenosine (**2**) was synthesized according to the procedure previously described<sup>[1]</sup>. The overall yield from adenosine over four steps was 81%. <sup>1</sup>H NMR (400 MHz, CDCl<sub>3</sub>) δ<sub>H</sub> 1.38 (3H, s), 1.46 (18H, s), 1.65 (3H, s), 3.81 (1H, m), 3.98 (1H, d, *J* = 12.7 Hz), 4.54 (1H, d, *J* = 1.2 Hz), 5.11 (1H, dd, *J* = 6.0, 1.1 Hz), 5.21 (1H, t, *J* = 5.6 Hz), 5.37 (1H, dd, *J* = 10.9, 1.8 Hz), 5.95 (1H, d, *J* = 4.7 Hz), 8.14 (1H, s), 8.83 (1H, s); ESI-MS for C<sub>23</sub>H<sub>33</sub>N<sub>5</sub>O<sub>8</sub> [M+Na<sup>+</sup>] calcd 530, found 530.

### **Compound 3**

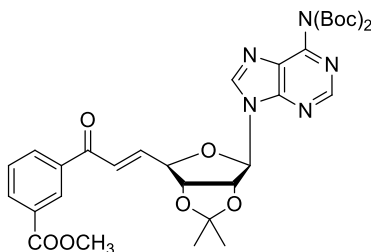

To a stirred solution of *N*<sup>6</sup>,*N*<sup>6</sup>-Bis(*tert*-butoxycarbonyl)-2',3'-*O*-isopropylideneadenosine (**2**) (760 mg, 1.5 mmol) and 2-(3-methoxycarbonylphenyl)-2-oxoethyltriphenylphosphorane<sup>[2]</sup> (2.6 g, 6.0 mmol, 4 equiv.) in dry CH<sub>2</sub>Cl<sub>2</sub> (15 mL) was added Dess-Martin periodinane (1.9 g, 4.5 mmol, 3 equiv.) at 0 °C. The mixture was allowed to stir at room temperature for 12 h. After dilution with 30 mL EtOAc, the mixture was filtered. The filtrate was subsequently washed with a mixture of saturated Na<sub>2</sub>S<sub>2</sub>O<sub>3</sub> solution and saturated NaHCO<sub>3</sub> solution (1:1) followed by water and brine. It was then dried over anhydrous Na<sub>2</sub>SO<sub>4</sub> and concentrated under reduced pressure. The resulting residue was purified by column chromatography on silica gel (Et<sub>2</sub>O/CH<sub>2</sub>Cl<sub>2</sub> 1:10) to yield **3** (397 mg, 40%) as a white foam. <sup>1</sup>H NMR (300 MHz, CDCl<sub>3</sub>) δ<sub>H</sub> 1.42 (3H, s), 1.44 (18H, s), 1.67 (3H, s), 3.94 (3H, s), 4.96 (1H, t, *J* = 4.1 Hz), 5.20 (1H, dd, *J* = 6.3, 4.0 Hz), 5.51 (1H, dd, *J* = 6.3, 2.0 Hz), 6.23 (1H, d, *J* = 2.1 Hz), 7.01 (1H, dd, *J* = 15.5, 1.1 Hz), 7.13 (1H, dd, *J* = 15.4, 5.0 Hz), 7.52 (1H, t, *J* = 7.8 Hz), 7.94 (1H, d, *J* = 7.8 Hz), 8.17 (1H, s), 8.21 (1H, d, *J* = 7.8 Hz), 8.49 (1H, s), 8.83 (1H, s); ESI-MS for C<sub>33</sub>H<sub>39</sub>N<sub>5</sub>O<sub>10</sub> [M+Na<sup>+</sup>] calcd 688, found 688.

#### Compound 4

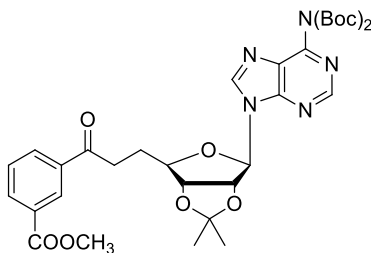

Compound **3** (397 mg, 0.6 mmol) was stirred with 10% palladium on charcoal (50 mg) in methanol (10 mL) at room temperature under 1 atm of hydrogen gas for 12 h. The reaction mixture was filtered through a pad of celite and concentrated to afford a yellow glass. Purification of the crude product on a silica gel column (Et<sub>2</sub>O/CH<sub>2</sub>Cl<sub>2</sub> 1:10) yielded **4** (358 mg, 90%) as a colorless glass. <sup>1</sup>H NMR (300 MHz, CDCl<sub>3</sub>) δ<sub>H</sub> 1.40 (3H, s), 1.46 (18H, s), 1.62 (3H, s), 2.22 (2H, m), 3.12 (2H, m), 3.95 (3H, s), 4.32 (1H, m), 4.94 (1H, dd, *J* = 6.5, 4.1 Hz), 5.48 (1H, dd, *J* = 6.5, 2.5 Hz), 6.10 (1H, d, *J* = 2.5 Hz), 7.52 (1H, t, *J*

= 7.8 Hz), 8.09 (1H, d,  $J = 7.8$  Hz), 8.14 (1H, s), 8.21 (1H, d,  $J = 7.7$  Hz), 8.56 (1H, s), 8.86 (1H, s); ESI-MS for  $C_{33}H_{41}N_5O_{10}$   $[M+Na^+]$  calcd 690, found 690.

### 6-Amino-6-deoxyfutalosine

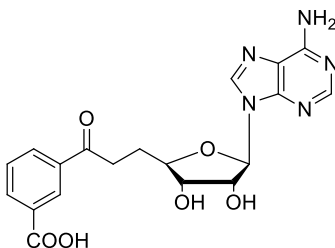

Compound **4** (358 mg, 0.54 mmol) was dissolved in 50% trifluoroacetic acid in  $CH_2Cl_2$ - $H_2O$  (4:1, 5 mL). The reaction was allowed to stir at room temperature for 2.5 hours before solvents were evaporated. The crude product was purified by column chromatography on silica ( $CH_2Cl_2/MeOH$ , 20:1) to afford 6-amino-6-deoxyfutalosine methyl ester as a white solid. The methyl ester was subsequently dissolved in 0.2 M LiOH (5 mL), and was stirred at room temperature for 1 h before pH was adjusted to 7 with 1M HCl. Removal of solvent afforded the crude product, which was subsequently purified using a Waters Sep-Pak C18 column to give 6-amino-6-deoxyfutalosine as a white solid (121 mg, 54%).  $^1H$  NMR (300 MHz,  $D_2O$ )  $\delta_H$  2.30 (2H, m), 3.12 (2H, m), 4.27 (1H, m), 4.44 (1H, t,  $J = 5.0$  Hz), 4.92 (1H, t,  $J = 5.0$  Hz), 5.93 (1H, d,  $J = 4.8$  Hz), 7.49 (1H, t,  $J = 8.0$  Hz), 7.94 (1H, d,  $J = 7.9$  Hz), 8.09 (2H, m), 8.20 (1H, s), 8.31 (1H, s); ESI-MS for  $C_{19}H_{19}N_5O_6$   $[M+Na^+]$  calcd 436, found 436.

1. Bioorganic & Medicinal Chemistry, **17**, 6641-6650 (2009)
2. Tetrahedron Lett. **51**, 6463-6465 (2010)

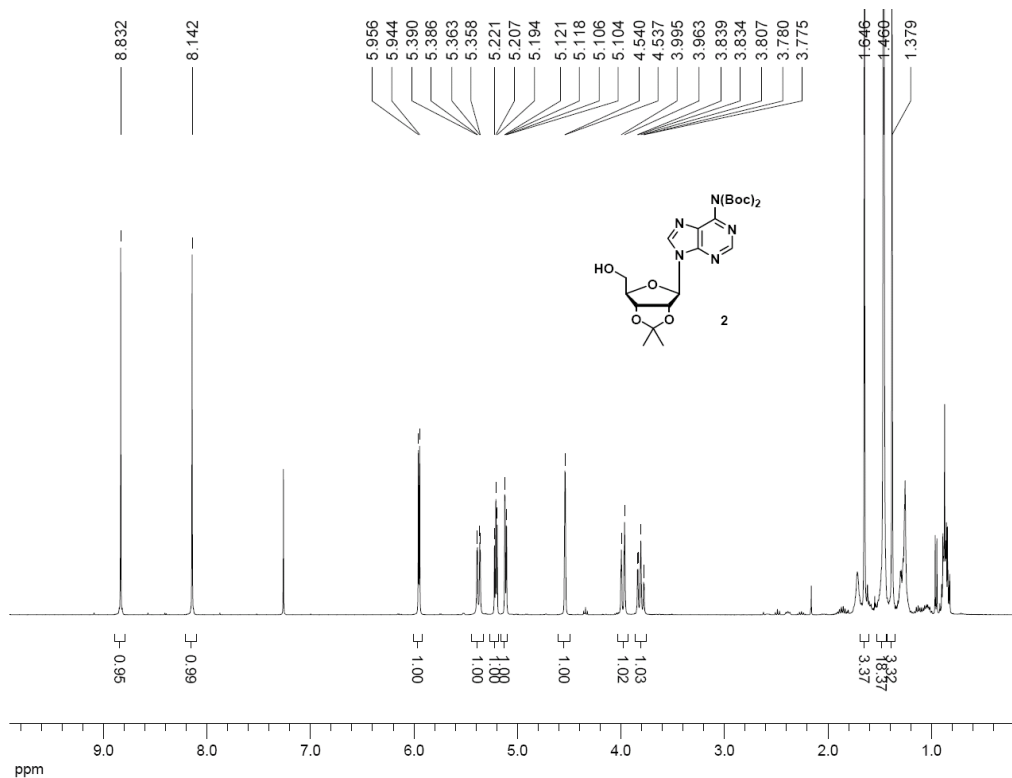

Figure S1.  $^1\text{H}$  NMR spectrum of compound **2** ( $\text{CDCl}_3$ , 400 MHz).

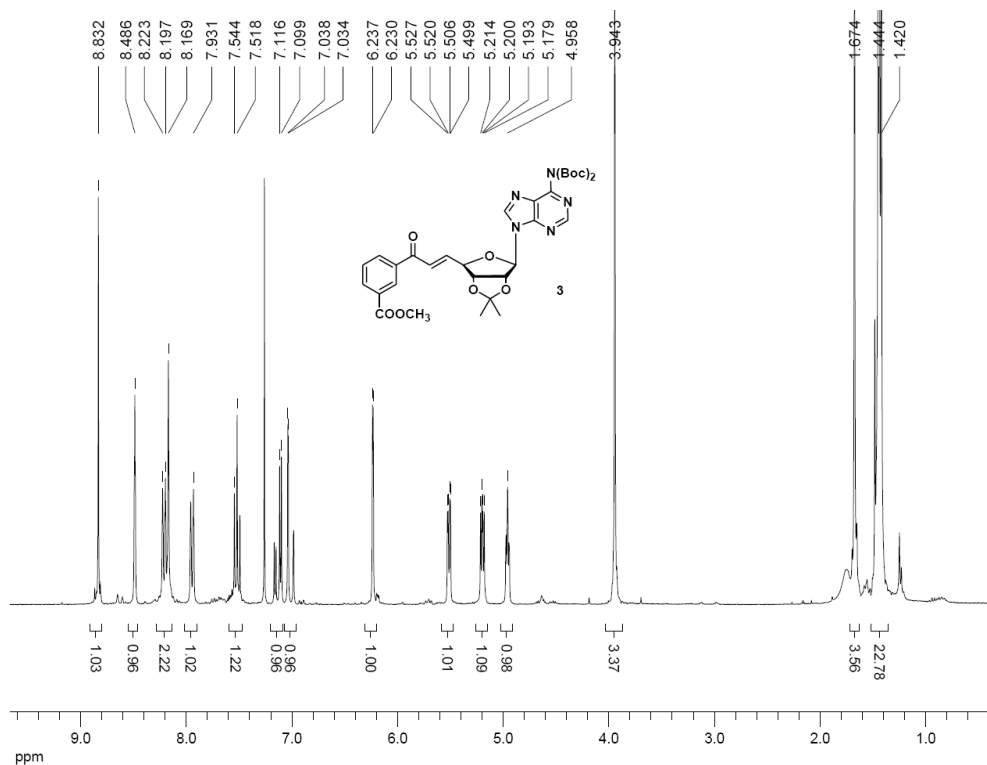

Figure S2.  $^1\text{H}$  NMR spectrum of compound **3** ( $\text{CDCl}_3$ , 300 MHz).

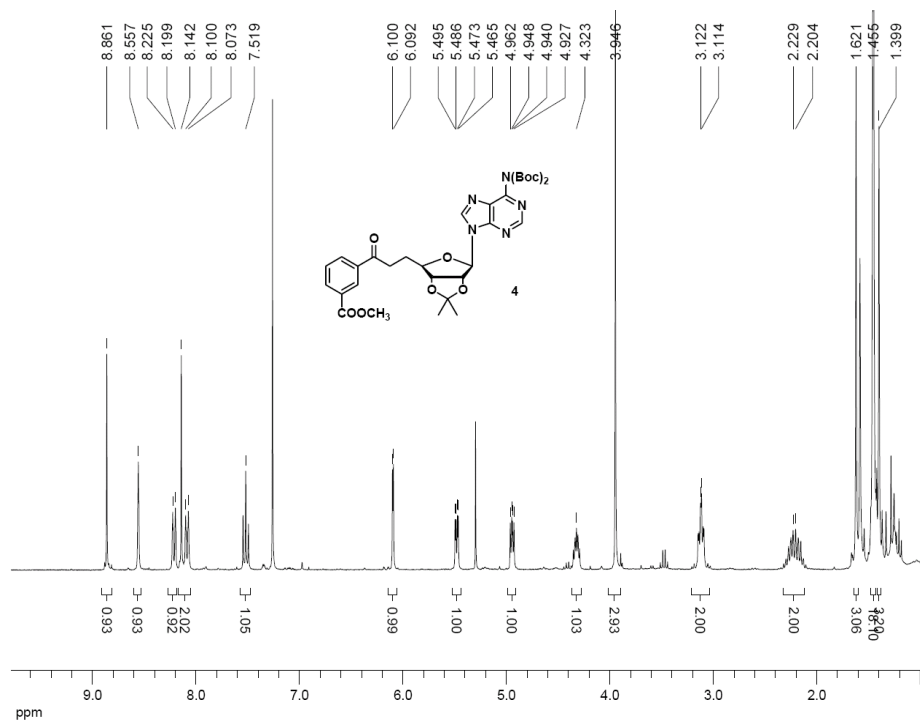

Figure S3. <sup>1</sup>H NMR spectrum of compound 4 (CDCl<sub>3</sub>, 300 MHz).

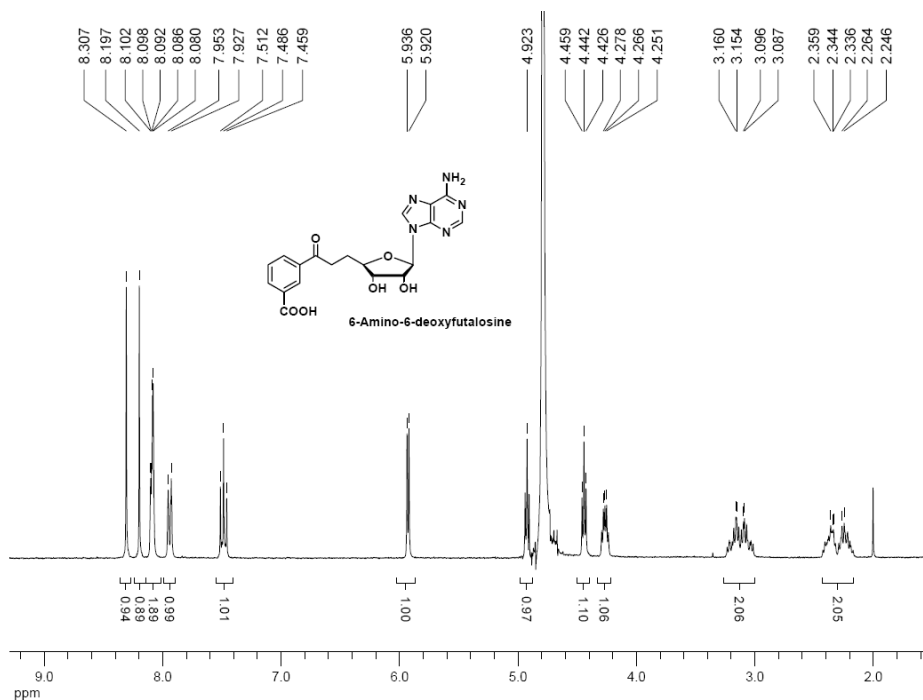

Figure S4. <sup>1</sup>H NMR spectrum of 6-amino-6-deoxyfucose (D<sub>2</sub>O, 300 MHz).

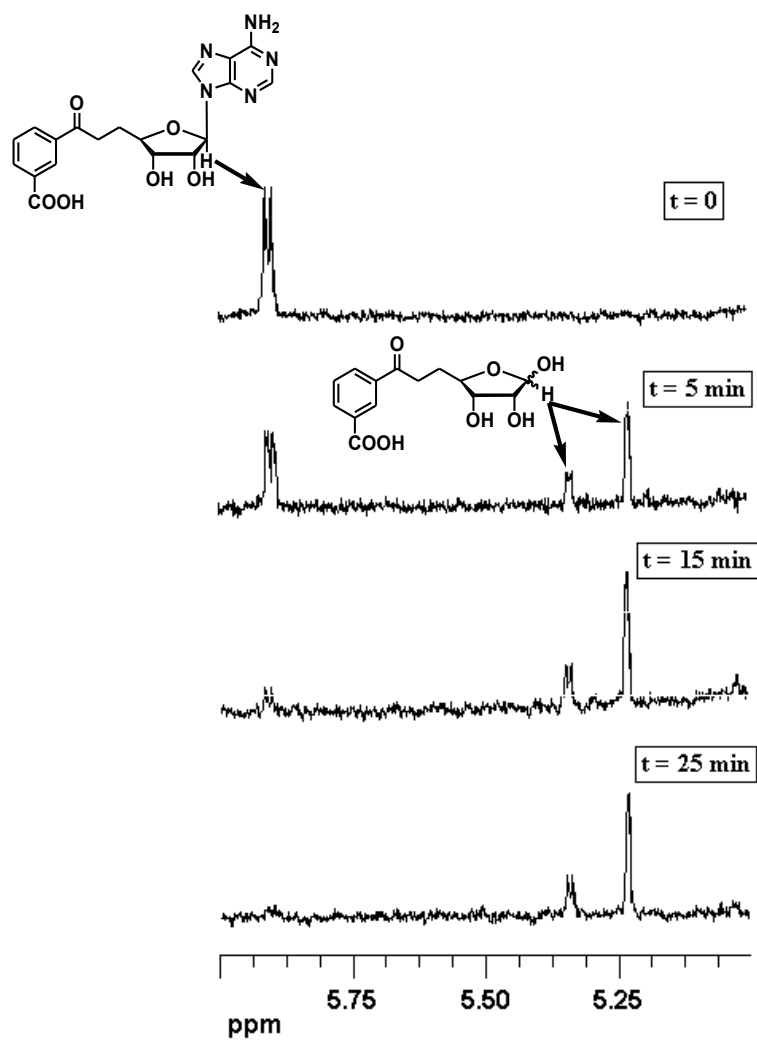

Figure S5.  $^1\text{H}$  NMR spectral time course showing the conversion of 6-amino-6-deoxyfutosine into de-hypoxanthine futalosine (DHFL). The signals corresponding to the anomeric ribose proton are displayed.

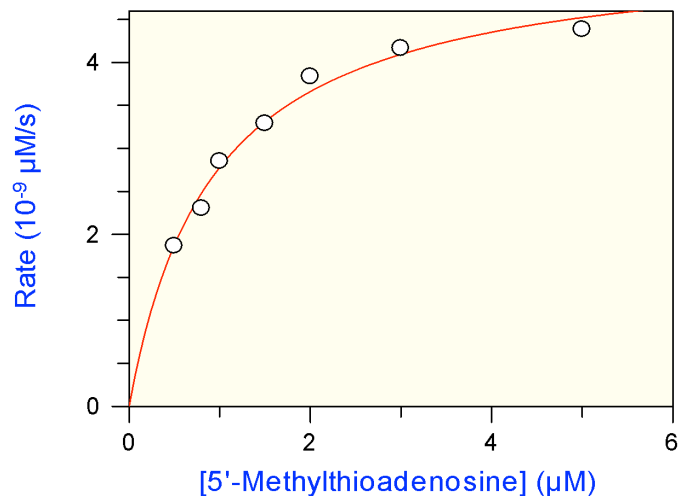

Figure S6. Plot of rate versus substrate concentration for the *C. jejuni* MTAN-catalyzed hydrolysis of 5'-methylthioadenosine. The data has been fitted to the Michaelis-Menten equation.

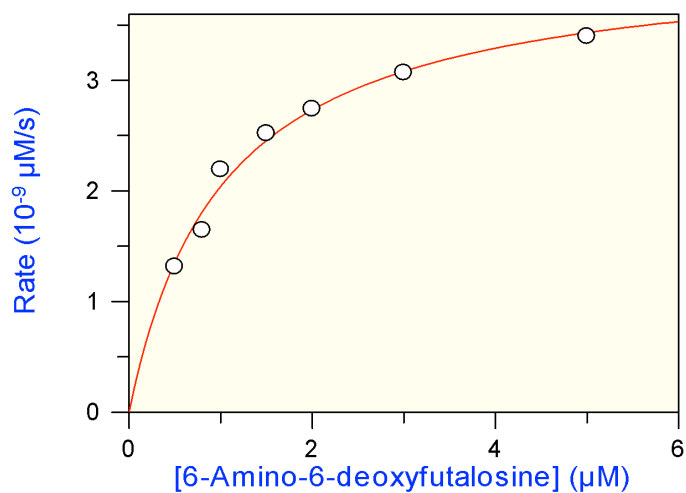

Figure S7. Plot of rate versus substrate concentration for the *C. jejuni* MTAN-catalyzed hydrolysis of 6-amino-6-deoxyfuralosine. The data has been fitted to the Michaelis-Menten equation.
